# Supplementary material for: Amino Acid Profiles in Older Adults with Frailty: Secondary Analysis from MetaboFrail and BIOSPHERE Studies
Source: MDPI journal article supplement (doi:10.3390/metabo13040542), 2023-04-10
Supplement: s1 [file s1]

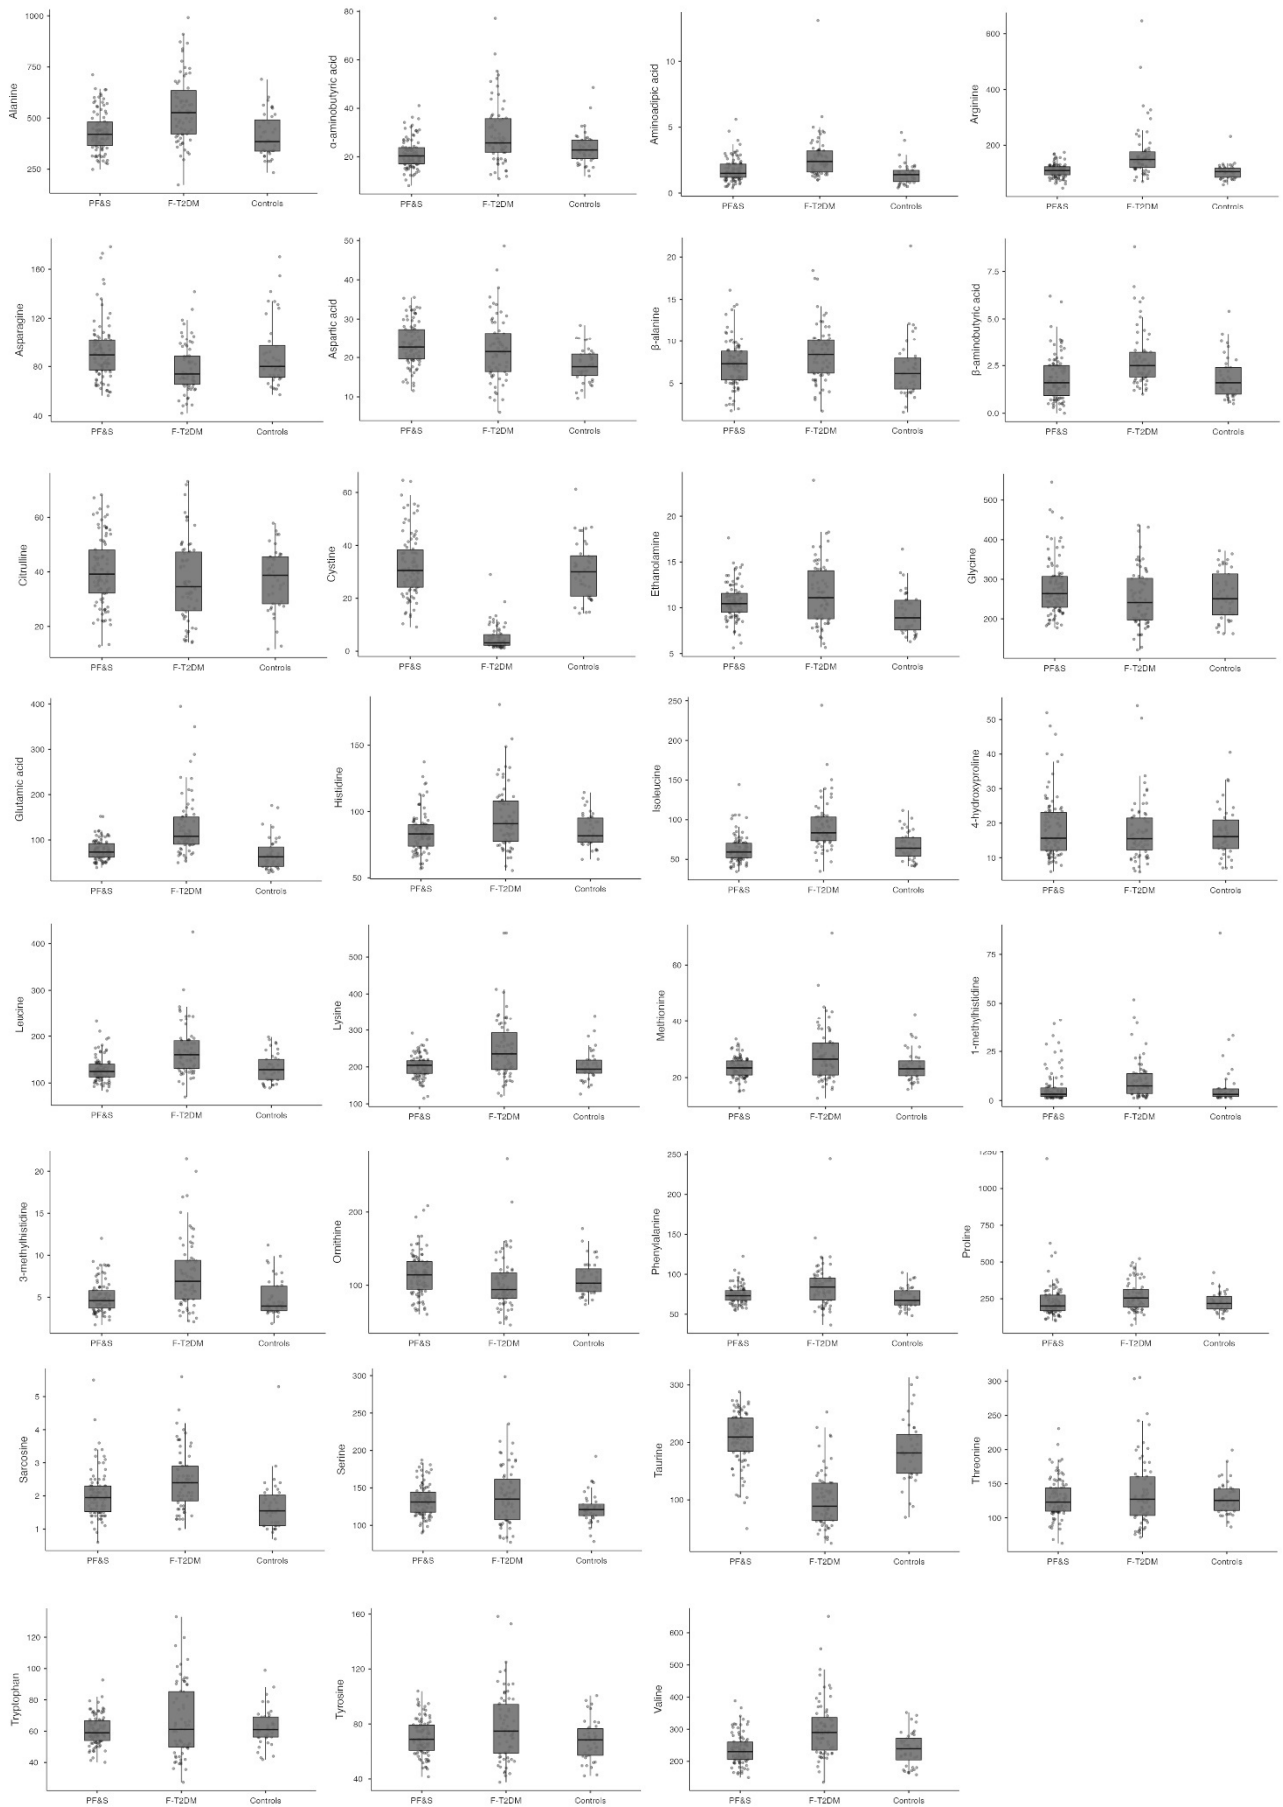

**Figure S1.** Serum amino acid concentrations in study participants according to frailty

category. Values are reported in  $\mu\text{mol/L}$ . Box plots show the median serum concentration (bold horizontal line), interquartile range (box), and total range of concentrations (bars). Abbreviations: F-T2DM, pre-frailty/frailty with type 2 diabetes mellitus; PF&S, physical frailty and sarcopenia.
